# Supplementary material for: Diurnal variation of aerosol indirect effect for warm marine boundary layer clouds in the eastern north Atlantic
Source: Copernicus journal article supplement (doi:10.5194/egusphere-2023-1676), 2023-08-23
Supplement: Supplementary file 1 [file egusphere-2023-1676-supplement.pdf]

1 Supplementary information for

## 2 **Diurnal variation of aerosol indirect effect for warm marine boundary** 3 **layer clouds in the eastern north Atlantic.**

4  
5 Shaoyue Qiu, Xue Zheng, David Painemal, Christopher R. Terai, and Xiaoli Zhou

6  
7 <sup>1</sup>Atmospheric, Earth and Energy Division, Lawrence Livermore National Laboratory, Livermore, California, USA

8 <sup>2</sup>Science Directorate, NASA Langley Research Center, Hampton, VA, USA

9 <sup>3</sup>Analytical Mechanics Associates, Hampton, VA, USA

10 <sup>4</sup>Chemical Sciences Laboratory, NOAA, Boulder, CO, USA,

11 <sup>5</sup>Cooperative Institute for Research in Environmental Sciences (CIRES), University of Colorado, Boulder, CO, USA

12

13

14 This file includes:

15 Supplementary text

16 Figs. S1 to S6

17

### 18 **Supplementary Text**

#### 19 Evaluation of Meteosat-11 cloud mask with ARM ground-based observations.

20 As the cloud fraction (CF) in Meteosat is defined as areal fraction of each time step, while CF from the ground-based radar-lidar  
21 observations is defined as the percentage of time when clouds are detected. To enable comparison, we calculate the CF from  
22 Meteosat over a  $0.5^\circ \times 0.5^\circ$  grid box centered at the ground site. For ground-based observations, CF is computed over a one-  
23 hour period centered at each Meteosat cycle (e.g., Dong et al., 2002, 2016; Xi et al., 2010). Since Meteosat is unable to observe  
24 low clouds below an upper cloud layer, boundary layer clouds in ARM ground-based observations are defined as clouds with the  
25 radar detected uppermost cloud tops below 3km to be consistent with satellite definition. In Figure S1, we present the average  
26 diurnal variation of boundary layer clouds derived from Meteosat and ARM ground-based observation during the four-month  
27 study period from 2018 to 2021 in July.

28

29

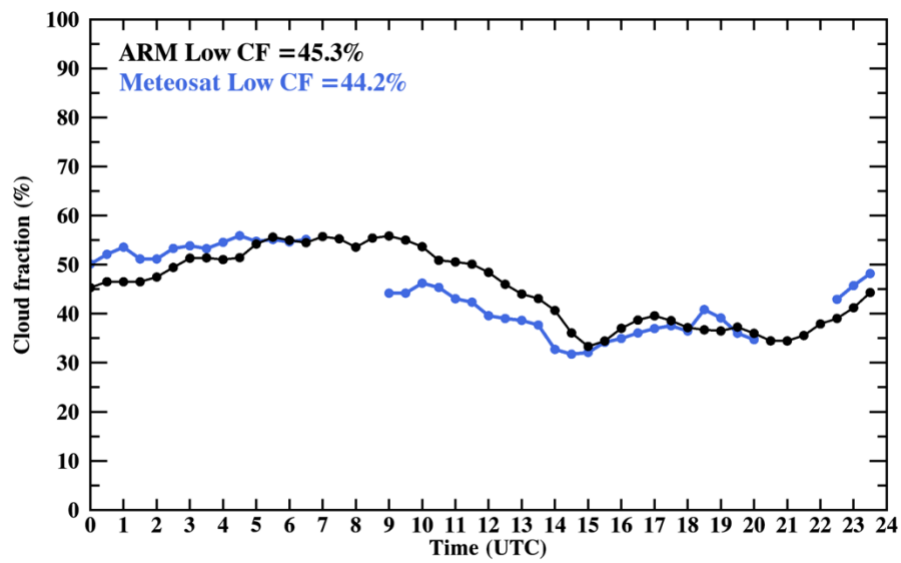

31  
32  
33  
34  
35

Figure S1: Diurnal variation of boundary layer cloud fraction derived from the ground-based radar-lidar-ceilometer measurements at the Atmospheric Radiation Measurement Eastern North Atlantic (ARM ENA) site (black line) and from Meeteosat-11 (blue line).

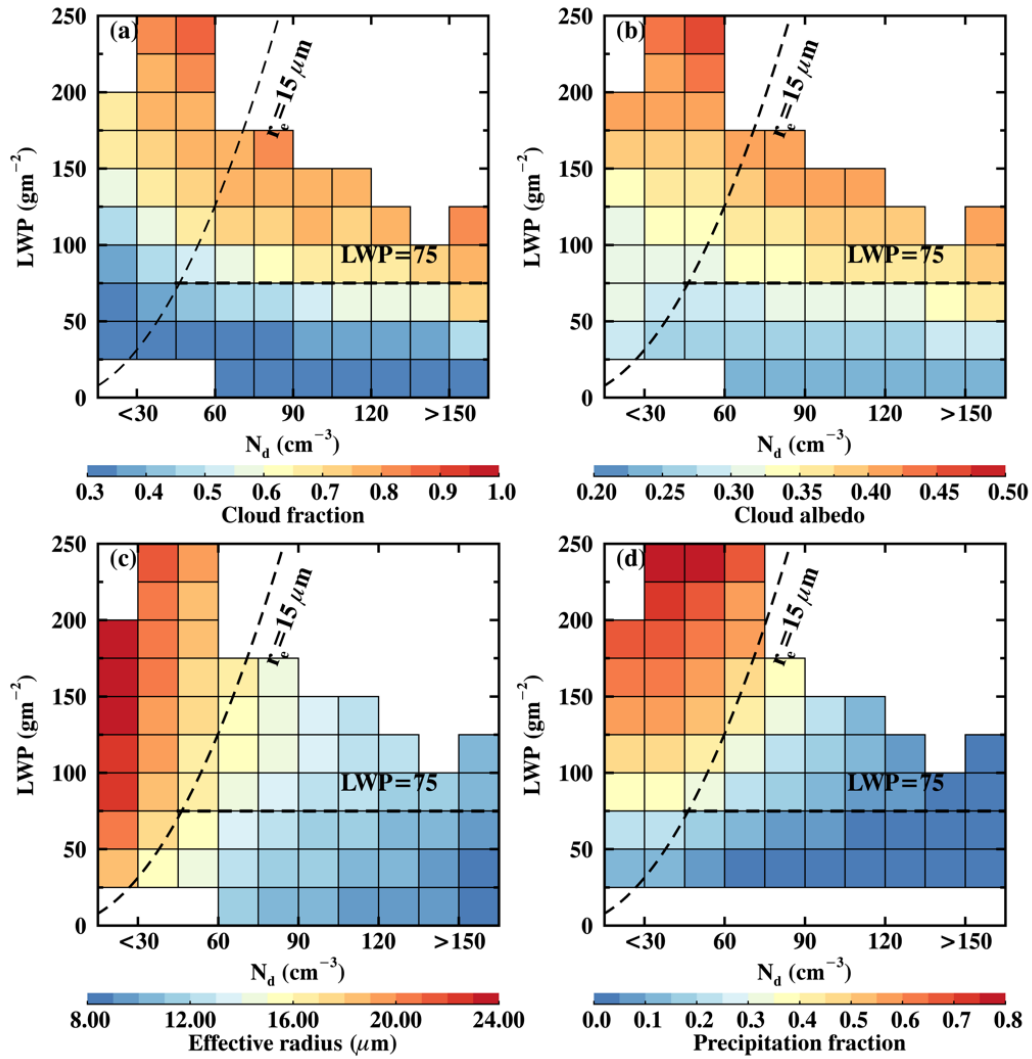

37  
38  
39  
40  
41

Figure S2. Daytime mean cloud properties for different  $N_d$  and LWP bins. (a) cloud fraction (b) cloud albedo, (c) effective radius, and (d) pixel-level precipitation fraction. The dashed lines indicate  $r_e = 15 \mu\text{m}$  and  $\text{LWP} = 75 \text{ gm}^{-2}$ , as thresholds for precipitation (precipitating clouds located to the left of the line) and thick clouds (with  $\text{LWP} > 75 \text{ gm}^{-2}$ ).

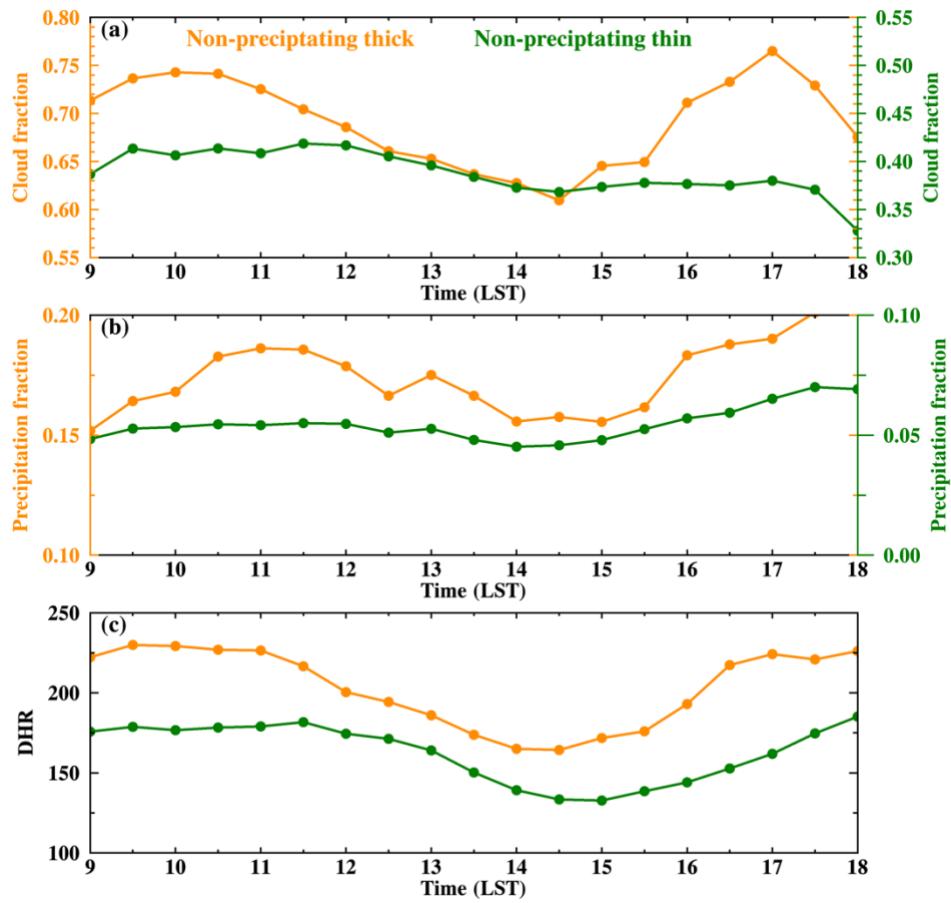

43  
44  
45  
46  
47

Figure S3. Diurnal variation of (a) cloud fraction, (b) pixel-level precipitation fraction, and (c) diameter-to-height ratio (DHR) for non-precipitating clouds. Different colors represent different cloud states as indicated in (a). Please note that the non-precipitating thin cloud in (a) and (b) use the y-axis on the right side.

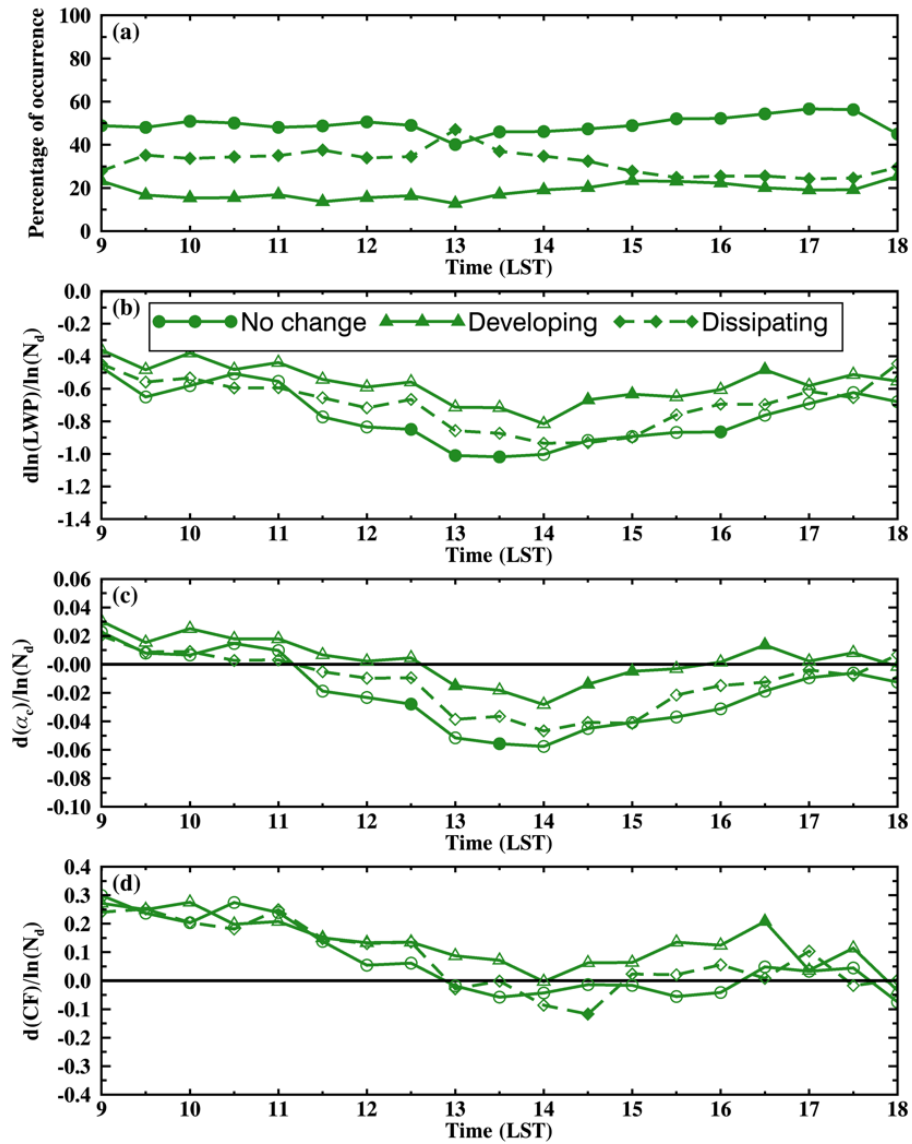

49  
 50  
 51  
 52  
 53  
 54  
 55  
 56  
 57

Figure S4. Daytime variation of non-precipitating thin clouds that have small changes in the  $1^\circ \times 1^\circ$  mean cloud fraction (CF) (No change, solid line with circle symbols), with an increase in the mean CF (developing, solid line with triangle symbols), and with a decrease in the mean CF (dissipating, dash line with diamond symbols) within a 30-minute window. (a) Percentage of occurrence for the three groups above, (b) cloud LWP susceptibility ( $d\ln(LWP)/d\ln(N_d)$ ), (c) cloud albedo susceptibility ( $d\alpha_c/d\ln(N_d)$ ), and (d) cloud fraction susceptibility ( $dCF/d\ln(N_d)$ ) for non-precipitating thin clouds. Symbols representing different cloud stages are noted in (b). In (b)-(d), filled markers indicate data points that are significantly different from the other two groups ( $p < 0.05$ ). Open markers indicate statistical insignificance.

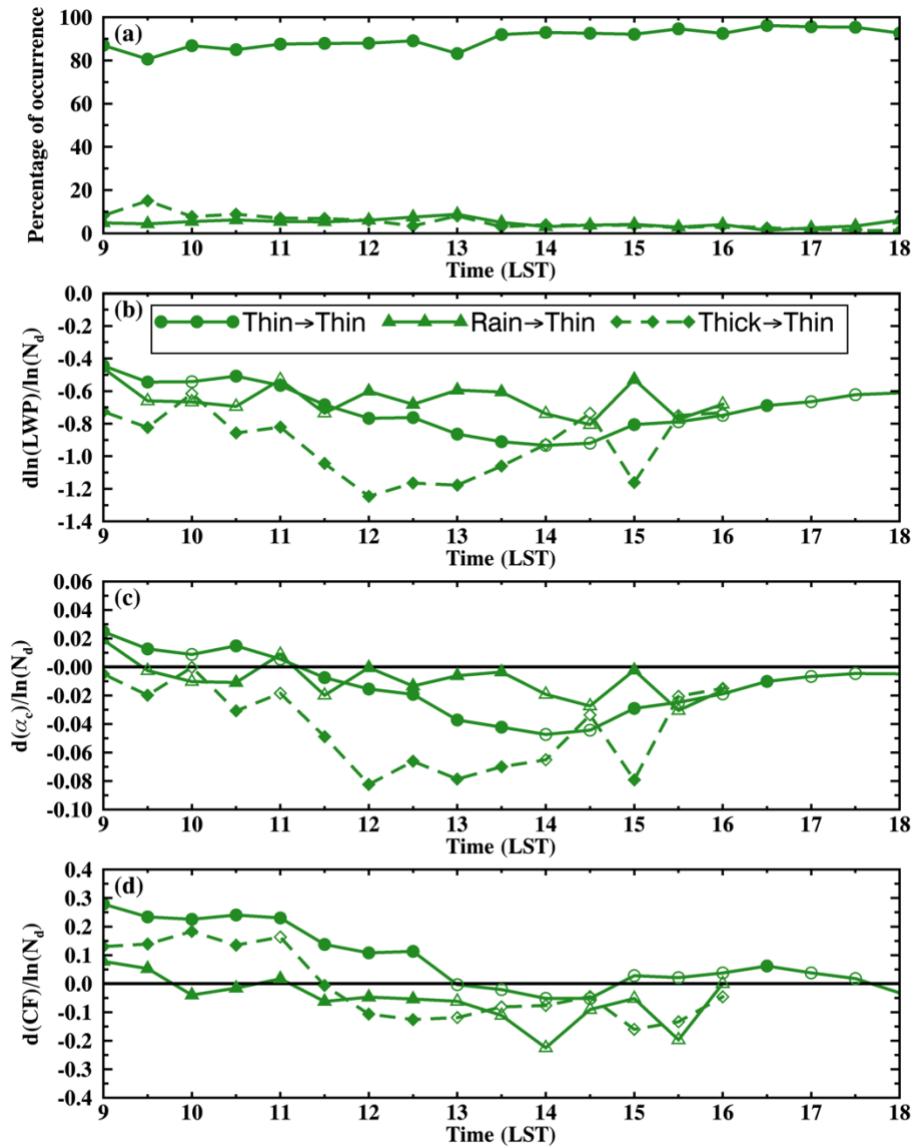

59  
 60  
 61  
 62  
 63  
 64  
 65  
 66  
 67

Figure S5. Daytime variation of non-precipitating thin clouds transition from non-precipitating thin clouds (thin  $\rightarrow$  thin, solid line with circle symbols), precipitating clouds (rain  $\rightarrow$  thin, solid line with triangle symbols), and non-precipitating thick clouds (thick  $\rightarrow$  thin, dash line with diamond symbols) in previous half an hour. (a) Percentage of occurrence for the three groups above, (b) cloud LWP susceptibility ( $d\ln(LWP)/d\ln(N_d)$ ), (c) cloud albedo susceptibility ( $d\alpha_c/d\ln(N_d)$ ), and (d) cloud fraction susceptibility ( $dCF/d\ln(N_d)$ ) for non-precipitating thin clouds. Symbols for different state transitions are noted in (b). In (b)-(d), filled markers indicate data points that are significantly different from the other two groups ( $p < 0.05$ ), while open markers indicate statistical insignificance.

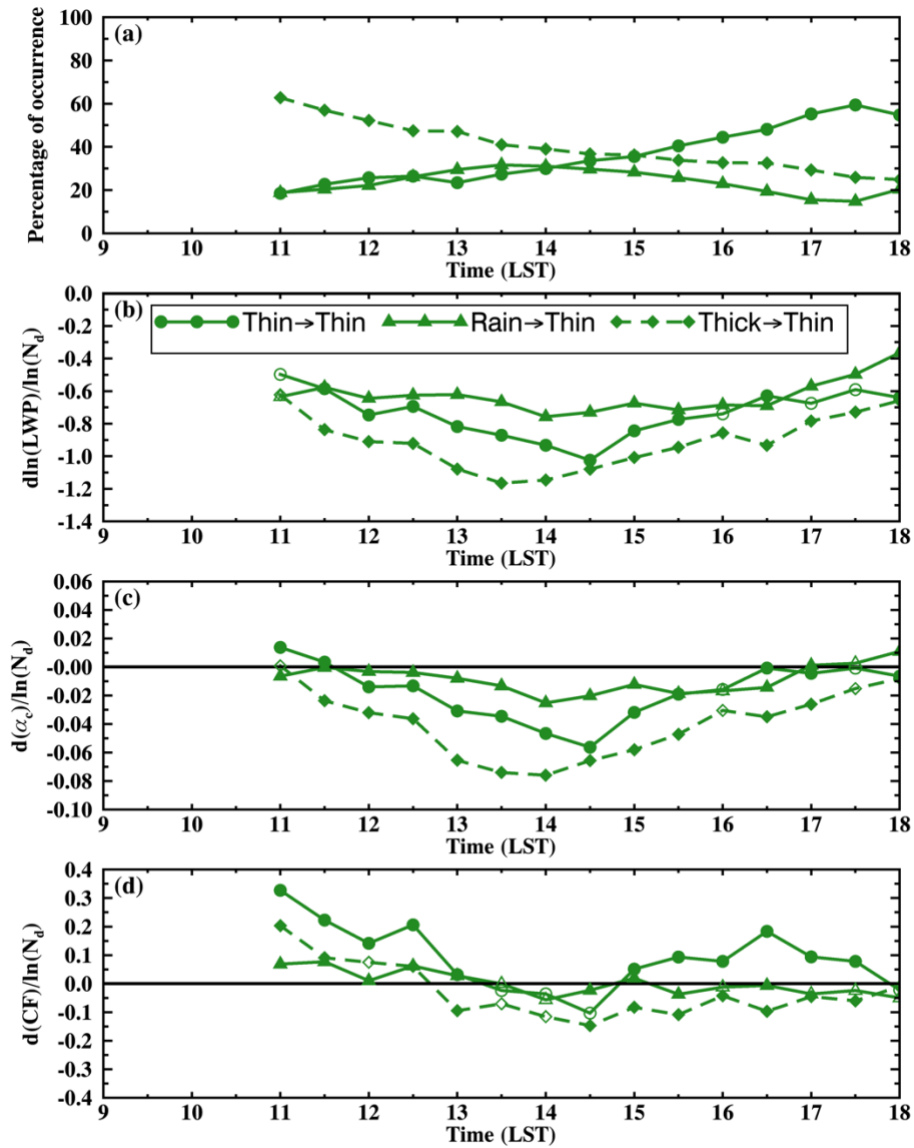

69

70

Figure S6. Daytime variation of non-precipitating thin clouds transition from non-precipitating thin clouds (thin  $\rightarrow$  thin, solid line with circle symbols), precipitating clouds (rain  $\rightarrow$  thin, solid line with triangle symbols), and non-precipitating thick clouds (thick  $\rightarrow$  thin, dash line with diamond symbols) in previous four hours. (a) Percentage of occurrence for the three groups above, (b) cloud LWP susceptibility ( $d\ln(LWP)/d\ln(N_d)$ ), (c) cloud albedo susceptibility ( $d\alpha_c/d\ln(N_d)$ ), and (d) cloud fraction susceptibility ( $dCF/d\ln(N_d)$ ) for non-precipitating thin clouds. Symbols for different state transitions are noted in (b). In (b)-(d), filled markers indicate data points that are significantly different from the other two groups ( $p < 0.05$ ), while open markers indicate statistical insignificance. The lack of definition of cloud state transition between 9-11 LST is due to filtering of cloud retrievals with the SZA threshold.

78
